# Supplementary material
Source: MDPI journal article supplement (https://www.mdpi.com/2227-9040/12/2/29)
Supplement: s1 [file s1]

# RepDwNet: Lightweight Deep Learning Model for Special biological blood Raman spectra analysis

Jiongheng He<sup>1</sup>, Ri-gui Zhou<sup>1,\*</sup>, Pengju Ren<sup>1</sup>, Yaochong Li<sup>1</sup> and Shengjun Xiong<sup>2</sup>

- <sup>1</sup> College of Information Engineering, Shanghai Maritime University, Research Center of Intelligent Information Processing and Quantum Intelligent Computing, Shanghai, 201306, China; hejiongheng@163.com  
<sup>2</sup> HT-NOVACo.,Ltd, Beijing, 100621, China  
\* Correspondence: rgzhou@shmtu.edu.cn

**Table S1. Reflective Raman spectroscopy dataset category and sample details**

| Index | Species               | Blood |
|-------|-----------------------|-------|
| 1     | Black Bear            | 98    |
| 2     | Bohai Bull            | 147   |
| 3     | British Short         | 30    |
| 4     | Buffalo               | 30    |
| 5     | Cattle                | 30    |
| 6     | Chicken               | 196   |
| 7     | Duck                  | 150   |
| 8     | Eurasian Lynx         | 30    |
| 9     | Golden Monkey         | 30    |
| 10    | Goose                 | 150   |
| 11    | Horse                 | 138   |
| 12    | Kangaroo              | 30    |
| 13    | Mongolian Cattle      | 150   |
| 14    | Nanyang Cattle        | 147   |
| 15    | Panda                 | 30    |
| 16    | Pastoral Dog          | 30    |
| 17    | Pianniu               | 150   |
| 18    | Pig                   | 34    |
| 19    | Pigeon                | 115   |
| 20    | Qinghai Yellow Cattle | 147   |
| 21    | Red Crowned Crane     | 30    |
| 22    | Shiba Inu             | 30    |
| 23    | Sika Deer             | 30    |
| 24    | Tengchong Horse       | 144   |
| 25    | Tibetan Cattle        | 150   |
| 26    | Tibetan Donkey        | 150   |
| 27    | Tibetan Horse         | 150   |
| 28    | Yunnan Donkey         | 150   |

**Table S2. Transmission Raman spectroscopy dataset category and sample details**

| Index | Species               | Blood |
|-------|-----------------------|-------|
| 1     | Black_Bear            | 100   |
| 2     | Blue_Yellow_Parrot    | 12    |
| 3     | Bohai_Cattle          | 168   |
| 4     | Chicken               | 205   |
| 5     | Demoiselle_Crane      | 10    |
| 6     | Duck                  | 150   |
| 7     | Dzo                   | 160   |
| 8     | Gallus                | 10    |
| 9     | Gibbon                | 10    |
| 10    | Golden_Monkey         | 10    |
| 11    | Golden_Pheasant       | 12    |
| 12    | Goose                 | 149   |
| 13    | Horse                 | 136   |
| 14    | Leopard               | 10    |
| 15    | Mongolian_Cattle      | 166   |
| 16    | Nanyang_Cattle        | 160   |
| 17    | Pheasant              | 11    |
| 18    | Pig                   | 34    |
| 19    | Pigeon                | 124   |
| 20    | Qinghai_Yellow_Cattle | 160   |
| 21    | Syrmaticus_Reevesii   | 12    |
| 22    | Tengchong_Horse       | 160   |
| 23    | Tibetan_Cattle        | 160   |
| 24    | Tibetan_Donkey        | 160   |
| 25    | Tibetan_Horse         | 161   |
| 26    | White_Naped_Crane     | 10    |
| 27    | White_Stork           | 10    |
| 28    | Yunnan_Donkey         | 150   |

**Table S3. Classification report of Raman RepDwNet for reflective Raman spectral of blood species identification**

| Class            | Precision | Recall | F1-score | Support |
|------------------|-----------|--------|----------|---------|
| Black Bear       | 1.0000    | 1.0000 | 1.0000   | 20      |
| Bohai Bull       | 1.0000    | 1.0000 | 1.0000   | 2       |
| British Short    | 0.9429    | 1.0000 | 0.9706   | 33      |
| Buffalo          | 0.9535    | 1.0000 | 0.9762   | 41      |
| Cattle           | 1.0000    | 1.0000 | 1.0000   | 2       |
| Chicken          | 1.0000    | 0.9333 | 0.9655   | 30      |
| Duck             | 0.9697    | 1.0000 | 0.9846   | 32      |
| Eurasian Lynx    | 0.6667    | 1.0000 | 0.8000   | 2       |
| Golden Monkey    | 1.0000    | 1.0000 | 1.0000   | 2       |
| Goose            | 1.0000    | 1.0000 | 1.0000   | 2       |
| Horse            | 1.0000    | 1.0000 | 1.0000   | 2       |
| Kangaroo         | 0.9667    | 1.0000 | 1.0000   | 29      |
| Mongolian Cattle | 1.0000    | 1.0000 | 1.0000   | 27      |
| Nanyang Cattle   | 1.0000    | 1.0000 | 1.0000   | 2       |
| Panda            | 1.0000    | 0.9697 | 0.9846   | 33      |
| Pastoral Dog     | 1.0000    | 0.9688 | 0.9841   | 32      |
| Pianniu          | 1.0000    | 1.0000 | 1.0000   | 2       |

|                       |        |        |        |     |
|-----------------------|--------|--------|--------|-----|
| Pig                   | 1.0000 | 1.0000 | 1.0000 | 6   |
| Pigeon                | 1.0000 | 0.9583 | 0.9787 | 24  |
| Qinghai Yellow Cattle | 1.0000 | 1.0000 | 1.0000 | 32  |
| Red Crowned Crane     | 1.0000 | 0.5000 | 0.6667 | 2   |
| Shiba Inu             | 1.0000 | 1.0000 | 1.0000 | 32  |
| Sika Deer             | 1.0000 | 1.0000 | 1.0000 | 32  |
| Tengchong Horse       | 1.0000 | 1.0000 | 1.0000 | 32  |
| Tibetan Cattle        | 1.0000 | 0.9688 | 0.9841 | 32  |
| Tibetan Donkey        | 1.0000 | 1.0000 | 1.0000 | 2   |
| Tibetan Horse         | 1.0000 | 1.0000 | 1.0000 | 2   |
| Yunnan Donkey         | 1.0000 | 1.0000 | 1.0000 | 30  |
| accuray               |        |        |        | 519 |
| macro avg             | 0.9821 | 0.9750 | 0.9742 | 519 |
| weighted avg          | 0.9877 | 0.9865 | 0.9864 | 519 |

**Table S4. Classification report of Raman RepDwNet for transmission Raman spectral of blood species identification**

| Class                 | Precision | Recall | F1-score | Support |
|-----------------------|-----------|--------|----------|---------|
| Black_Bear            | 1.0000    | 1.0000 | 1.0000   | 19      |
| Blue_Yellow_Parrot    | 1.0000    | 1.0000 | 1.0000   | 29      |
| Bohai_Cattle          | 0.8571    | 1.0000 | 0.9231   | 6       |
| Chicken               | 1.0000    | 1.0000 | 1.0000   | 6       |
| Demoiselle_Crane      | 1.0000    | 1.0000 | 1.0000   | 6       |
| Duck                  | 0.9730    | 0.9231 | 0.9474   | 39      |
| Dzo                   | 0.9667    | 0.9667 | 0.9667   | 30      |
| Gallus                | 1.0000    | 1.0000 | 1.0000   | 6       |
| Gibbon                | 1.0000    | 1.0000 | 1.0000   | 6       |
| Golden_Monkey         | 0.8286    | 0.9667 | 0.8923   | 30      |
| Golden_Pheasant       | 1.0000    | 0.9259 | 0.9615   | 27      |
| Goose                 | 0.9667    | 1.0000 | 1.0000   | 6       |
| Horse                 | 1.0000    | 1.0000 | 1.0000   | 30      |
| Leopard               | 1.0000    | 1.0000 | 1.0000   | 29      |
| Mongolian_Cattle      | 1.0000    | 1.0000 | 1.0000   | 6       |
| Nanyang_Cattle        | 1.0000    | 0.8333 | 0.9091   | 6       |
| Pheasant              | 1.0000    | 1.0000 | 1.0000   | 30      |
| Pig                   | 1.0000    | 1.0000 | 1.0000   | 6       |
| Pigeon                | 0.9524    | 0.8696 | 0.9091   | 23      |
| Qinghai_Yellow_Cattle | 1.0000    | 1.0000 | 1.0000   | 29      |
| Syrmaticus_Reevesii   | 1.0000    | 1.0000 | 0.6667   | 6       |
| Tengchong_Horse       | 1.0000    | 1.0000 | 1.0000   | 6       |
| Tibetan_Cattle        | 1.0000    | 1.0000 | 1.0000   | 6       |
| Tibetan_Donkey        | 1.0000    | 1.0000 | 1.0000   | 28      |
| Tibetan_Horse         | 1.0000    | 1.0000 | 1.0000   | 30      |
| White_Naped_Crane     | 0.9677    | 1.0000 | 0.9836   | 30      |
| White_Stork           | 1.0000    | 1.0000 | 1.0000   | 30      |
| Yunnan_Donkey         | 1.0000    | 1.0000 | 1.0000   | 30      |
| accuray               |           |        |          | 535     |
| macro avg             | 0.9838    | 0.9816 | 0.9819   | 535     |
| weighted avg          | 0.9811    | 0.9794 | 0.9796   | 535     |
